# Supplementary material for: 3D reconstruction of SARS-CoV-2 infection in ferrets emphasizes focal infection pattern in the upper respiratory tract
Source: bioRxiv or medRxiv preprint supplement (doi:10.1101/2020.10.17.339051), 2020-10-18
Supplement: Supplementary file [file media-1.pdf]

## 1 **Supplementary Material**

2 **Supplementary Figure S1: No SARS-CoV-2 colocalization of antibody signals is**  
3 **observable in tissue from mock-infected control animals.** Volumetric projections  
4 of nasal turbinate (A), lung (B), and trachea (C) tissue from mock-infected control  
5 animals. No colocalization of the polyclonal serum (#1, green) and the monoclonal mix  
6 (#2, magenta) can be detected. Cyan/grayscale = autofluorescence. Edge length of  
7 grid squares = 1.000  $\mu\text{m}$ . Total magnification = 1.6x (A and B), 2x (C).

8 **Supplementary Figure S2: No SARS-CoV-2 infection foci were detected in ferret**  
9 **tracheal tissue.** Volumetric projection of a large ferret trachea section. Only unspecific  
10 background staining is detectable for the polyclonal serum (#1, green) and the  
11 monoclonal antibody mix (#2, magenta). No signal overlap of both antibody signals  
12 was observable. Cyan/grayscale = autofluorescence. Edge length of grid squares =  
13 800  $\mu\text{m}$ . Total magnification = 2x.

14 **Supplementary Table S1: List of chemicals and reagents.**

15 **Supplementary Movie S1: Volumetric 3D projection of an LSFM-acquired, > 200**  
16  **$\text{mm}^3$ -sized nasal turbinate section from a SARS-CoV-2-infected ferret.** The tissue  
17 morphology was reconstructed using non-specific tissue autofluorescence (cyan).  
18 Edge length of grid squares = 2 mm. Total magnification = 1.26x.

19 **Supplementary Movie S2: Fly-through animation of individual SARS-CoV-2**  
20 **infection foci in ferret nasal turbinates at 4 days post-infection.** The three distinct  
21 SARS-CoV-2 infection foci from Figures 3 and 4 are highlighted at timestamps (mm:ss)  
22 00:09 [A1], 00:14 [A5], and 00:25 [A7]. Cyan = autofluorescence; green = SARS-CoV-  
23 2 N #1; magenta = SARS-CoV-2 N #2. Edge length of grid squares = 300  $\mu\text{m}$ . Total  
24 magnification = 8x.

25 **Supplementary Movie S3: 360° rotation of a trachea section from a SARS-CoV-**  
26 **2-infected ferret at 4 days post-infection.** No SARS-CoV-2-associated infection  
27 spots were detected. Cyan = autofluorescence; green = SARS-CoV-2 N #1; magenta  
28 = SARS-CoV-2 N #2. Edge length of grid squares = 800  $\mu\text{m}$ . Total magnification = 2x.

29 **Supplementary Movie S4: Fly-through animation of likely debris-associated**  
30 **SARS-CoV-2 infection in ferret lung tissue.** The colocalization of either SARS-CoV-  
31 2 N antibody signal (#1, green; #2, magenta) inside a lung airway can be observed at

32 timestamp (mm:ss) 00:16. Cyan = autofluorescence. Edge length of grid squares =  
33 200  $\mu\text{m}$ . Total magnification = 6.4x.

34

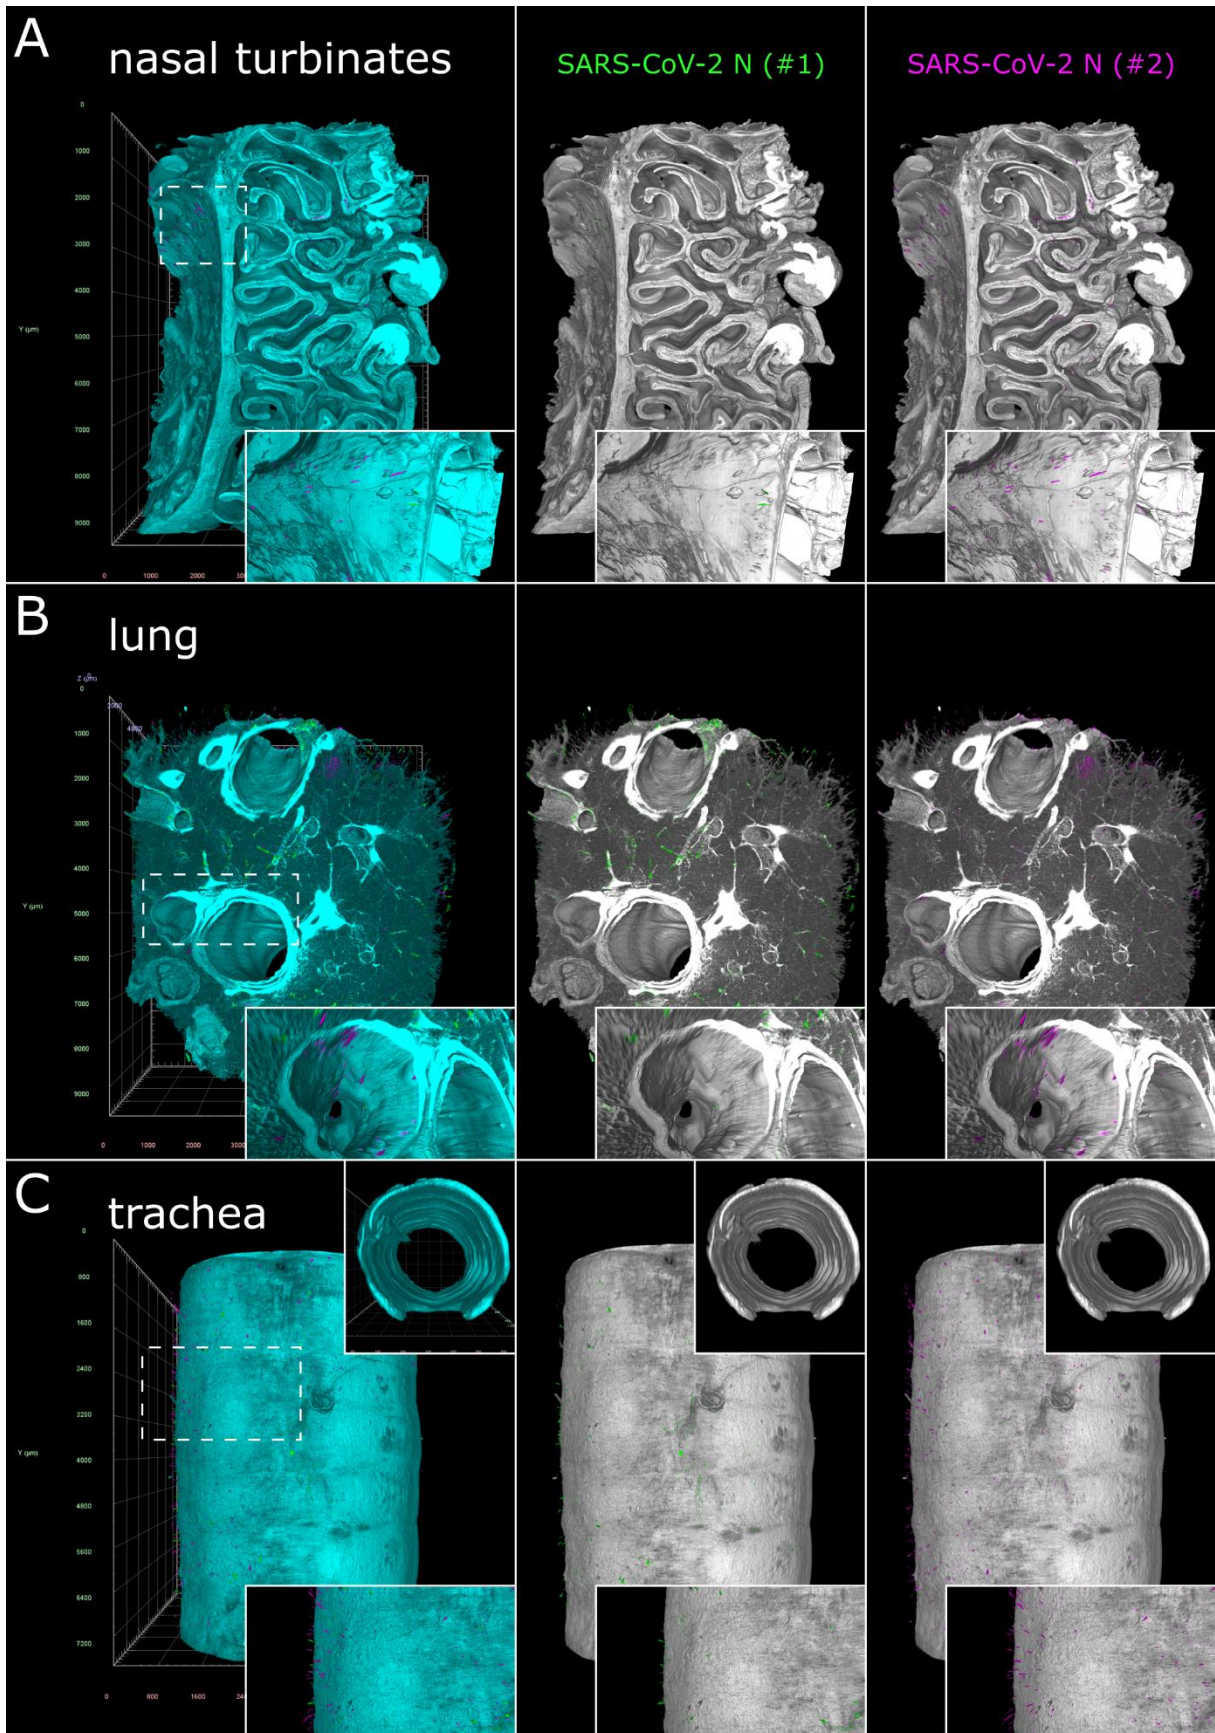

35

36 **Supplementary Figure S1: No SARS-CoV-2 colocalization of antibody signals is**  
 37 **observable in tissue from mock-infected control animals. Volumetric projections**

38 of nasal turbinate **(A)**, lung **(B)**, and trachea **(C)** tissue from mock-infected control  
39 animals. No colocalization of the polyclonal serum (#1, green) and the monoclonal mix  
40 (#2, magenta) can be detected. Cyan/grayscale = autofluorescence. Edge length of  
41 grid squares = 1,000  $\mu\text{m}$ . Total magnification = 1.6x (A and B), 2x (C).

42

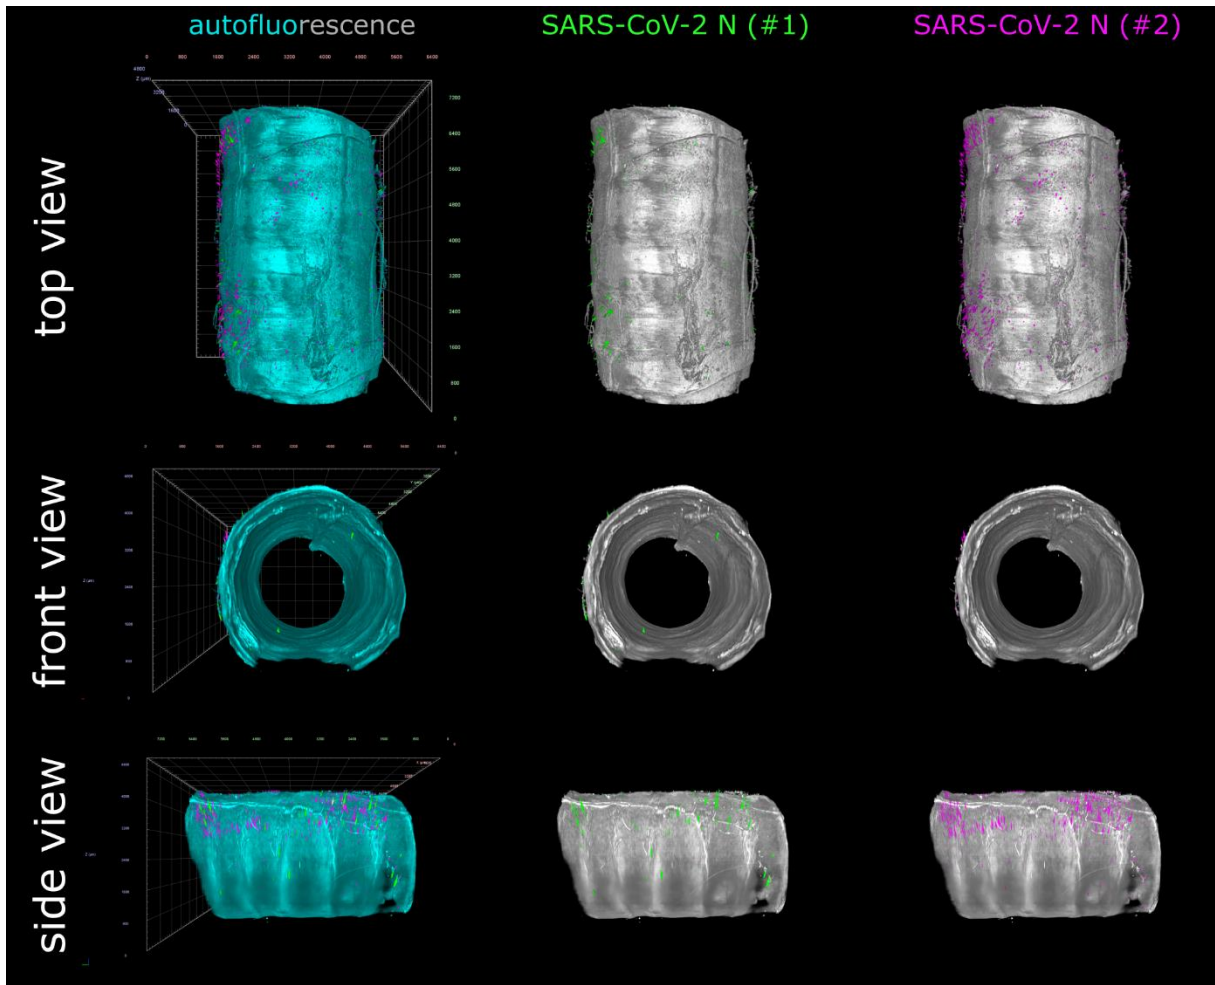

43

44 **Supplementary Figure S2: No SARS-CoV-2 infection foci were detected in ferret**  
 45 **tracheal tissue at 4 days post-infection.** Volumetric projection of a large ferret  
 46 trachea section. Only unspecific background staining is detectable for the polyclonal  
 47 serum (#1, green) and the monoclonal antibody mix (#2, magenta). No signal overlap  
 48 of both antibody signals was observable. Cyan/grayscale = autofluorescence. Edge  
 49 length of grid squares = 800  $\mu\text{m}$ . Total magnification = 2x.

50

51 **Supplementary Table 1: List of chemicals and reagents.**

| <b>reagents</b>     | <b>source</b> | <b>PO number</b> | <b>additional information</b> |
|---------------------|---------------|------------------|-------------------------------|
| DMSO                | Carl Roth     | 4720             | dimethyl sulfoxide            |
| ethanol             | Carl Roth     | 9065             | dehydrating agent             |
| ethyl cinnamate     | Alfa Aesar    | A12906           | clearing agent                |
| Formical-2000™      | Statlab       | 1314             | decalcifier                   |
| glycine             | Carl Roth     | 3908             | autofluorescence quencher     |
| heparin sodium salt | Carl Roth     | 7692             | reduction of background       |
| hydrogen peroxide   | Carl Roth     | 8070             | bleaching agent               |
| n-hexane            | Alfa Aesar    | 43263            | delipidating agent            |
| normal donkey serum | Bio-Rad       | C06SBZ           | blocking agent                |
| Triton X-100        | Carl Roth     | 3051             | detergent                     |
| Tween-20            | AppliChem     | A4974            | detergent                     |

52
